# Supplementary material for: Digital therapeutics from bench to bedside
Source: Springer Nature journal article supplement (doi:10.1038/s41746-023-00777-z), 2023-03-10
Supplement: MOESM1 [file 41746_2023_777_MOESM1_ESM.pdf]

# Supplementary Information

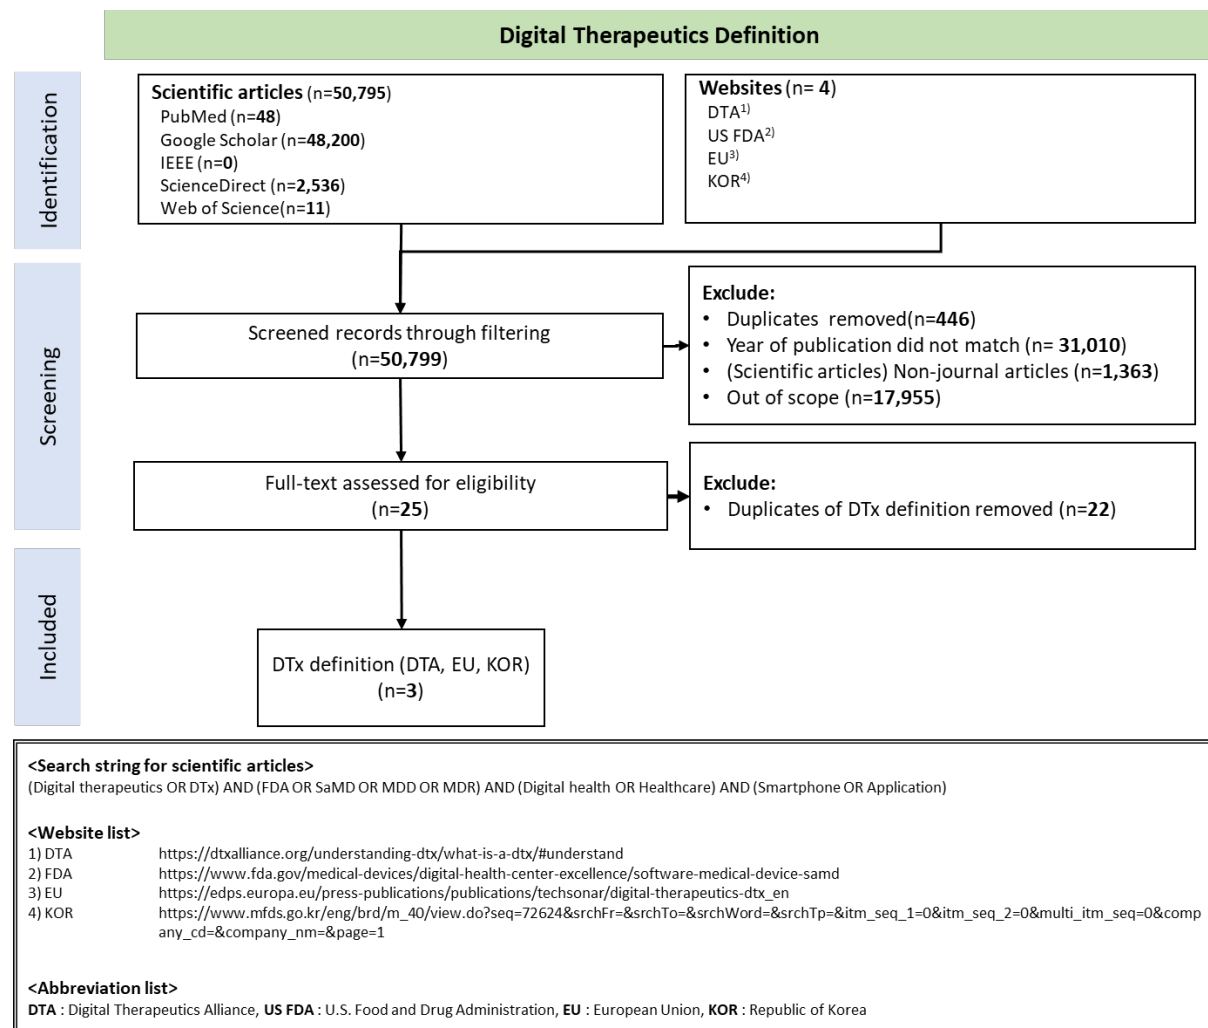

**Supplementary Figure 1.** Flowchart for search process related to definition of digital therapeutics

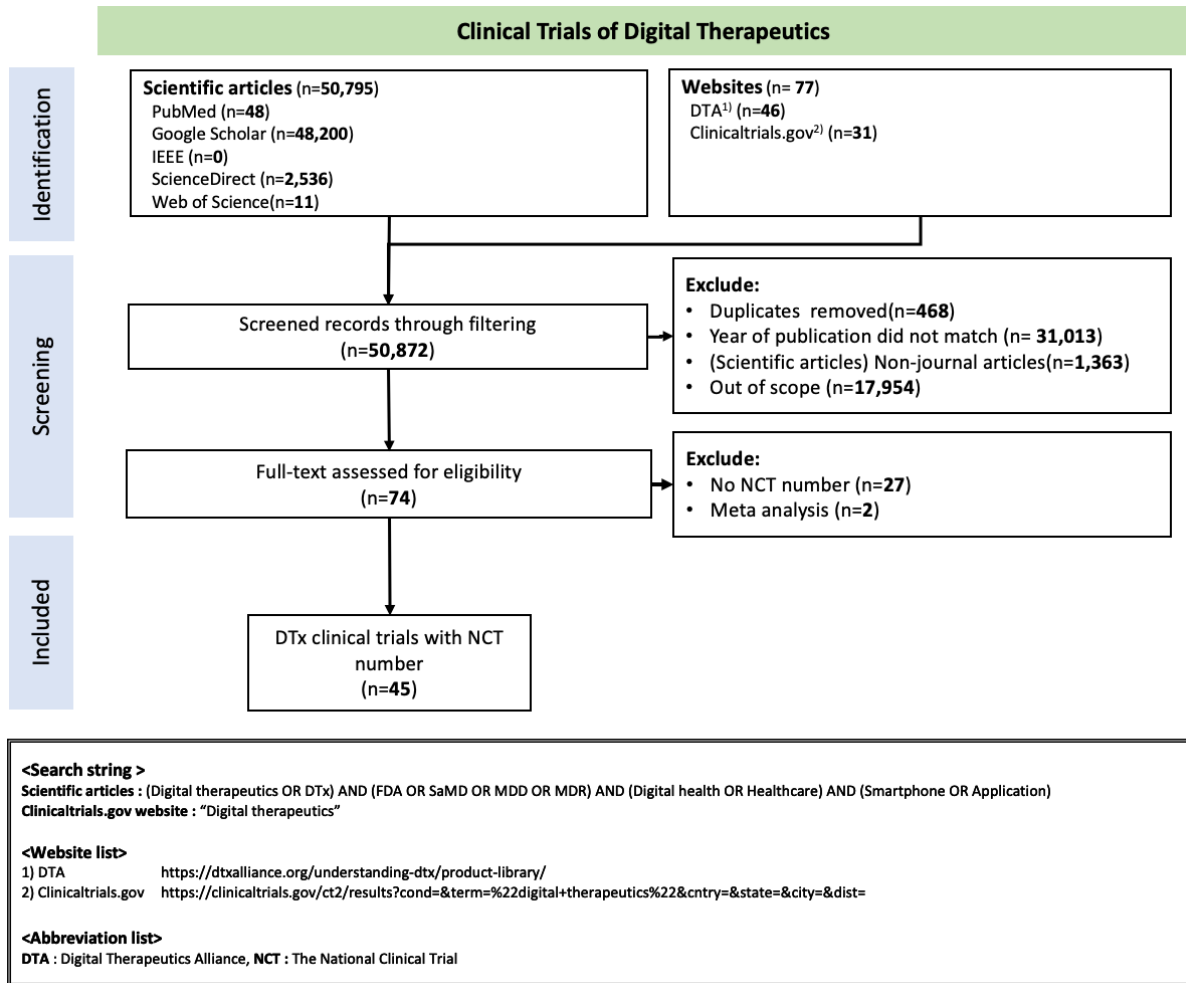

**Supplementary Figure 2.** Flowchart for search process related to clinical trials of digital therapeutics

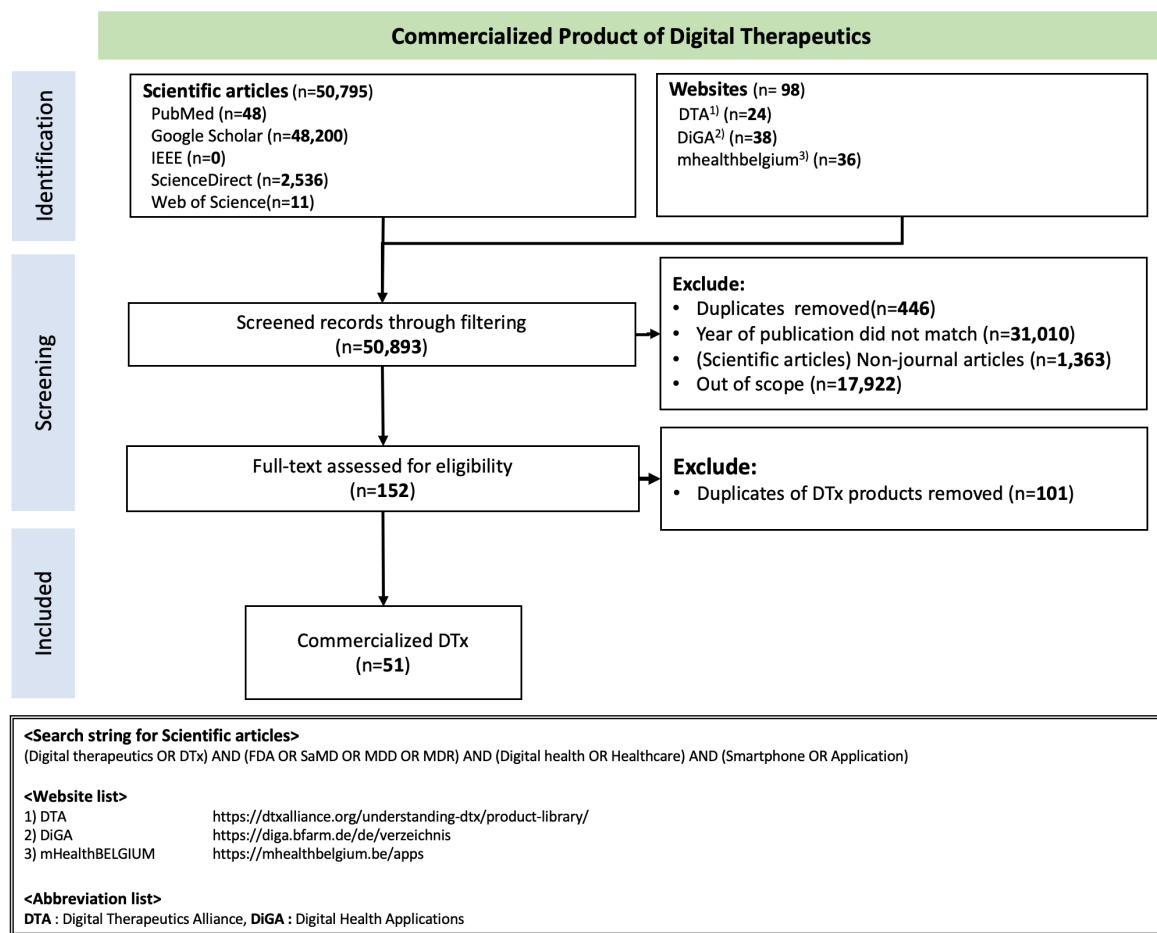

**Supplementary Figure 3.** Flowchart for search process related to commercialized DTx of digital therapeutics

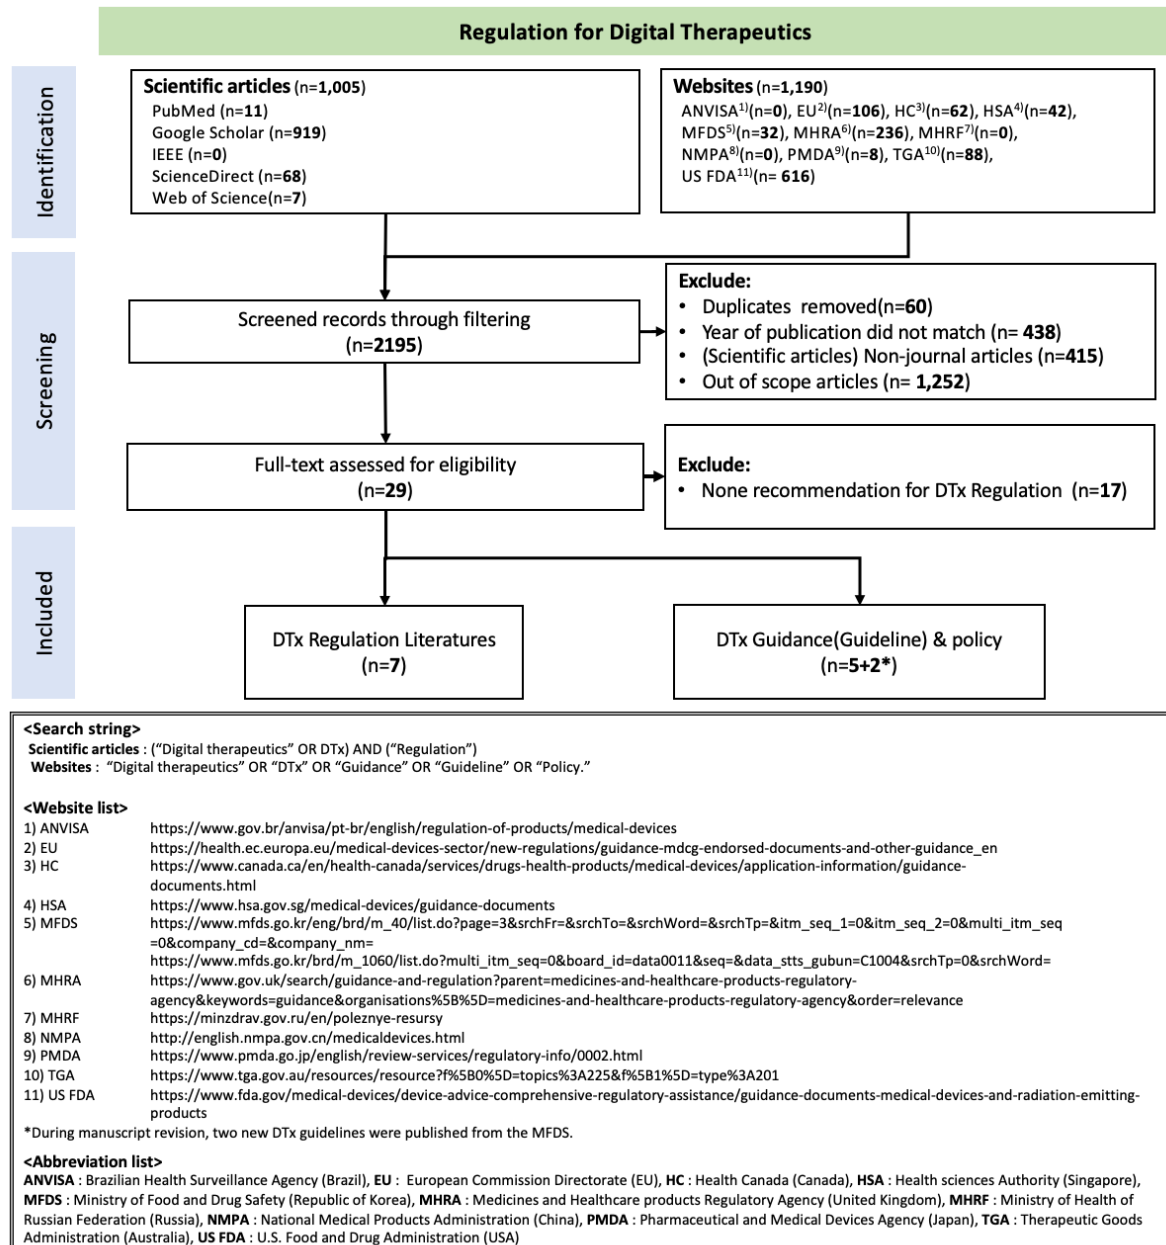

**Supplementary Figure 4.** Flowchart for search process related to regulation of digital therapeutics

**Supplementary Table 1.** Status of clinical trials with NCT number related on digital therapeutics registered on ClinicalTrials.gov (<https://clinicaltrials.gov>) or on DTA website (<https://dtxalliance.org>)

| Conditions                                                      | Status                 | Interventions                                                                                                    | Sponsor                      | Locations | Allocation | Enrollment (Age)    | Intervention model      | Primary purpose/outcomes                                                                                                                                                                                                                                                | NCT number  |
|-----------------------------------------------------------------|------------------------|------------------------------------------------------------------------------------------------------------------|------------------------------|-----------|------------|---------------------|-------------------------|-------------------------------------------------------------------------------------------------------------------------------------------------------------------------------------------------------------------------------------------------------------------------|-------------|
| Schizophrenia                                                   | Active, not recruiting | Device: CT-155                                                                                                   | Click Therapeutics           | US        | N/A        | 48 (18–64)          | Single Group Assignment | Primary purpose: Treatment<br>Primary outcome measures:<br>To explore feasibility and acceptability of the treatment monitoring and educational components of CT-155 app                                                                                                | NCT05438160 |
| COPD                                                            | Unknown                | Behavioral: Digital therapeutics                                                                                 | Senscio Systems              |           | RCT        | 240 (All)           | Parallel Assignment     | Primary purpose: Supportive care<br>Primary outcome measures: Reduction in acute care utilization                                                                                                                                                                       | NCT03131622 |
| Drug use disorders, illicit drug use, alcohol-related disorders | Recruiting             | Behavioral: Health coaching<br>Practice facilitation standard implementation                                     | Kaiser Permanente            | US        | Non- RCT   | 700 (18, and older) | Parallel Assignment     | Primary purpose: Health services research<br>Primary outcome measures:<br>Reach of the digital therapeutic to patients in the primary care clinic, Fidelity of patients use of the digital therapeutic to clinical recommendations                                      | NCT04907045 |
| Major depressive disorder                                       | Not yet recruiting     | Device: MEL-T01, MEL-S01                                                                                         | Aalto University             | FI        | RCT        | 800 (18–65)         | Parallel Assignment     | Primary purpose: Treatment<br>Primary outcome measures:<br>PHQ-9 total change from baseline to posttreatment: experimental group vs. treatment as usual group<br>active comparator group vs. treatment as usual group<br>experimental group vs. active comparator group | NCT05426265 |
| Autism spectrum disorder                                        | Completed              | Diagnostic Test: Cognoa ASD diagnostic device                                                                    | Cognoa, Inc.                 | US        | N/A        | 711 (18–72 months)  | Single Group Assignment | Primary purpose: Diagnostic<br>Primary outcome measures: Positive and negative predictive value of ASD Dx in relation to clinician diagnostic evaluation, No result percentage                                                                                          | NCT04151290 |
| Chronic low back pain, mastectomy, lumpectomy, migraine         | Recruiting             | Device: JOGO Digital Therapeutics EMG Biofeedback for Lower back pain, persistent post-mastectomy pain, migraine | Brigham and Women's Hospital | US        | RCT        | 330 (18–65)         | Parallel Assignment     | Primary purpose: Treatment<br>Primary outcome measures:<br>Change in pain intensity after the treatment period                                                                                                                                                          | NCT04607460 |
| Systemic lupus erythematosus                                    | Complete               | Behavioral: Mymee Program                                                                                        | Mymee, Inc.                  | US        | RCT        | 50 (18, and older)  | Parallel Assignment     | Primary purpose: Treatment<br>Primary outcome measures:<br>Brief pain inventory-short form (BPI-SF) , Functional assessment of chronic illness therapy- Fatigue (FACIT-Fatigue), LupusQOL                                                                               | NCT03426384 |
| Heart failure                                                   | Recruiting             | Other: Continuum HFC-IN<br>Other: Standard of care for the follow-up<br>Other: Continuum HFC-OUT                 | CRCHUM                       | CA        | RCT        | 400 (18, and older) | Parallel Assignment     | Primary purpose: health services research<br>Primary outcome measures:<br>CLIC IN ONLY: care consumption, CLIC OUT ONLY: change in guideline-directed medical therapy by classes, CLIC OUT ONLY: change in guideline-directed medical therapy by dose                   | NCT05377190 |

|                                                       |                         |                                                                                                         |                                             |    |     |                        |                         |                                                                                                                                                                                                                                                                                                                                                          |             |
|-------------------------------------------------------|-------------------------|---------------------------------------------------------------------------------------------------------|---------------------------------------------|----|-----|------------------------|-------------------------|----------------------------------------------------------------------------------------------------------------------------------------------------------------------------------------------------------------------------------------------------------------------------------------------------------------------------------------------------------|-------------|
| Postoperative pain                                    | Recruiting              | Device: RelieVRx headset<br>Drug: multi-modality pain management                                        | AppliedVR, Inc.                             | US | RCT | 113 (18, and older)    | Parallel Assignment     | Primary purpose: Supportive care<br>Primary outcome measures: Acute postoperative pain, Opioid consumption                                                                                                                                                                                                                                               | NCT04010266 |
| Chronic low back pain                                 | Active, not recruiting  | Other: DTx for pain, control software, standard care                                                    | Orion Corporation, Orion Pharma             | FI | RCT | 100 (18, and older)    | Parallel Assignment     | Primary purpose: Other<br>Primary outcome measures:<br>1) Self-report of disability, Oswestry, pain interface, 2) Objective report of disability, steps, 3) Fear of movement and re-injury, 4) Pain Behaviour, pain medications, 5) Quality of life, own experience, adverse events, change                                                              | NCT04225884 |
| Multiple sclerosis, mild cognitive impairment, cancer | Recruiting              | Other: CT-100 DiNaMo, Care-as-Usual                                                                     | CCT Research                                | US | RCT | 114 (22–75)            | Parallel Assignment     | Primary purpose: Basic Science<br>Primary outcome measures: Change in cognitive functioning<br>intervention group compared with a care-as-usual control group                                                                                                                                                                                            | NCT05438147 |
| Cancer                                                | Recruiting              | Device: Attune, Cerena                                                                                  | www.restoreclinicaltrial.com                | US | RCT | 352 (18, and older)    | Parallel Assignment     | Primary purpose: Treatment<br>Primary outcome measures: Symptoms of anxiety                                                                                                                                                                                                                                                                              | NCT05227898 |
| Cognitive dysfunction, Covid-19                       | Recruiting              | Device: AKL-T01                                                                                         | Weill Medical College of Cornell University | US | RCT | 125 (18–89)            | Crossover Assignment    | Primary purpose: Treatment<br>Primary outcome measures: Change in cognitive function, as measured by the digit symbol matching task                                                                                                                                                                                                                      | NCT04843930 |
| Diabetes 1, 2 Prediabetes                             | Unknown                 | Behavioral: One Drop   Experts on track, Experts on call, experts revive                                | Chandra Osborn                              | US | RCT | 500 (18–75)            | Parallel Assignment     | Primary purpose: Treatment<br>Primary outcome measures: Within- and between-group changes in central lab-assessed hemoglobin A1c measured at baseline and 3 months.                                                                                                                                                                                      | NCT03459573 |
| Fatigue, dyspnea, cognitive impairment, muscle pain   | Enrolling by invitation | Device: the multi-domain Tai Chi Digital Therapy Software Application                                   | Tim Shi                                     | US | RCT | 200 (18–75)            | Parallel Assignment     | Primary purpose: Supportive care<br>Primary outcome measures: Change in physical activity ability measured by 6-minute walking distance measurement (6MWT), Overall respiratory relief measured by the Post-COVID-19 Functional Status(PCFS) scale, Cognitive impairment improvement measured by the well-validated neuropsychological measurement tests | NCT05419219 |
| Opioid, drug use disorders                            | Recruiting              | Behavioral: Standard implementation<br>Behavioral: Health Coaching<br>Behavioral: Practice Facilitation | Kaiser Permanente                           | US | RCT | 13,000 (18, and older) | Factorial Assignment    | Primary purpose: Health services research<br>Primary outcome measures: Reach of the digital therapeutic to patients in the primary care clinic, Fidelity of patients' use of the digital therapeutic to clinical recommendations                                                                                                                         | NCT05160233 |
| Substance use disorder                                | Complete                | Behavioral: TES-NAV<br>Behavioral: TAU                                                                  | New York State Psychiatric Institute        | US | RCT | 53 (18–99)             | Single Group Assignment | Primary purpose: Treatment<br>Primary outcome measures: Consecutive weeks of drug/alcohol abstinence (12 weeks)                                                                                                                                                                                                                                          | NCT03363256 |

|                                                                                 |                         |                                                                                                                                                                  |                                          |    |     |                     |                         |                                                                                                                                                                                                                   |             |
|---------------------------------------------------------------------------------|-------------------------|------------------------------------------------------------------------------------------------------------------------------------------------------------------|------------------------------------------|----|-----|---------------------|-------------------------|-------------------------------------------------------------------------------------------------------------------------------------------------------------------------------------------------------------------|-------------|
| Covid-19, dyspnea                                                               | Complete                | Device: COVVR_Synch<br>Device: COVVR_Asynch                                                                                                                      | Ecole Polytechnique Fédérale de Lausanne | SZ | RCT | 26 (18, and older)  | Crossover Assignment    | Primary purpose: Supportive care<br>Primary outcome measures: Efficacy (breathing comfort & discomfort), VR intervention feasibility                                                                              | NCT04844567 |
| Virtual reality                                                                 | Recruiting              | Device: VR training<br>Device: VR activity                                                                                                                       | Medical University of Lodz               | PL | RCT | 100 (65–85)         | Parallel Assignment     | Primary purpose: Prevention<br>Primary outcome measures: Working memory and Attention                                                                                                                             | NCT05369897 |
| Insomnia, sleep disorder, sleep hygiene                                         | Enrolling by invitation | Behavioral: Online Cognitive-Behavioral Therapy for Insomnia and complementary therapies                                                                         | SleepUp Tecnologia em Saúde Ltda         | BR | RCT | 120 (20–60)         | Parallel                | Primary purpose: Treatment<br>Primary outcome measures: Adherence to the treatment, Response to treatment, Remission of symptoms, and Maintenance of results                                                      | NCT04949360 |
| Chronic pain, low back pain, shoulder pain                                      | Complete                | Device: telemedicine digital therapeutic                                                                                                                         | Karuna Labs Inc.                         | US | RCT | 10 (18, and older)  | Single Group Assignment | Primary purpose: Treatment<br>Primary outcome measure: Disabilities of the arm, shoulder, and hand and Upper extremity functional index                                                                           | NCT05375500 |
| Pre-diabetes, Overweight and obesity                                            | Unknown                 | Behavioral: MyDiPP (Malaysia Diabetes Prevention Program)<br>Other: usual care                                                                                   | University Sultan Zainal Abidin          | MY | RCT | 100 (18–65)         | Parallel Assignment     | Primary purpose: Prevention<br>Primary outcome measures: body weight                                                                                                                                              | NCT03997656 |
| Obesity, health behavior lifestyle                                              | Not yet recruiting      | Device: DTXO APP<br>Device: PLACEBO APP - Control group                                                                                                          | Advice Pharma Group Srl                  |    | RCT | 246 (18–65)         | Parallel Assignment     | Primary purpose: Supportive care<br>Primary outcome measures: Evaluation of change in body weight (kg).                                                                                                           | NCT05394779 |
| Post-partum depression                                                          | Recruiting              | Device: Stella (TM) Mobile Application                                                                                                                           | Curio Digital Therapeutics, Inc.         | US | N/A | 65 (18–50)          | Single Group Assignment | Primary purpose: Treatment<br>Primary outcome measures: Change in level of depression as measured using Edinburgh postpartum depression (EPDS)                                                                    | NCT05077644 |
| Respiratory system disease, chronic obstructive pulmonary disease, asthma, COPD | Recruiting              | Behavioral: Conventional rehabilitation treatment (e.g., leaflet) educated by hospital<br>Device: Digital treatment based on Respiratory Rehabilitation Software | LifeSemantics Corp.                      | KR | RCT | 100 (19–80)         | Parallel Assignment     | Primary purpose: Treatment<br>Primary outcome measures: The 6-min walking distance (6-min walking distance, 6MWD) change amount (in meters) at 12 weeks after respiratory rehabilitation compared to the baseline | NCT05299385 |
| Pulmonary disease, chronic obstructive pulmonary disease                        | Complete                | Device: Kaia COPD Application<br>Other: Usual care                                                                                                               | Kaia Health Software                     | SZ | RCT | 104 (40, and older) | Parallel Assignment     | Primary purpose: Treatment<br>Primary outcome measures: Steps per day as mean over one week from baseline until the treatment end                                                                                 | NCT04299165 |

|                                                                   |                         |                                                                                                              |                                           |    |         |                     |                         |                                                                                                                                                                                                                                                                                                                                                                                                                                                  |             |
|-------------------------------------------------------------------|-------------------------|--------------------------------------------------------------------------------------------------------------|-------------------------------------------|----|---------|---------------------|-------------------------|--------------------------------------------------------------------------------------------------------------------------------------------------------------------------------------------------------------------------------------------------------------------------------------------------------------------------------------------------------------------------------------------------------------------------------------------------|-------------|
| Parkinson's disease                                               | Not yet recruiting      | Device: Digital music therapeutic<br>Behavioral: Active-Control                                              | Boston University<br>Charles River Campus | US | RCT     | 44 (40–80)          | Parallel Assignment     | Primary purpose: Treatment<br>Primary outcome measures: Physical activity based on the amount of moderate intensity walking, Gait quality based on variability of stride length, Gait quality based on variability of swing time, Self-Report Behavioral Automaticity Index (SRBAI)                                                                                                                                                              | NCT05421624 |
| Chronic kidney diseases, diabetes arterial hypertension (10 more) | Recruiting              | Device: KidneYou App                                                                                         | Advice Pharma Group Srl                   | IT | RCT     | 210 (18, and older) | Parallel Assignment     | Primary purpose: Supportive care<br>Primary outcome measures: Evaluation of changes in azoturia, distance covered, and perceived Stress                                                                                                                                                                                                                                                                                                          | NCT05286632 |
| Multiple myeloma, solitary plasmacytoma, amyloidosis              | Recruiting              | Device: RITA (App)                                                                                           | Advice Pharma Group Srl                   | IT | Non-RCT | 122 (18, and older) | Parallel Assignment     | Primary purpose: Supportive care<br>Primary outcome measures: Evaluating changes in actual dose intensity                                                                                                                                                                                                                                                                                                                                        | NCT05260203 |
| Cognitive decline                                                 | Recruiting              | Device: CURATE.AI                                                                                            | National University Hospital              | SG | N/A     | 15 (21–99)          | Single Group Assignment | Primary purpose: Treatment<br>Primary outcome measures: Patient acceptability of the digital cognitive test battery DI/DD obtained during a semi-structured interview, Patient adherence to the DI/DD, Patient attrition rate to the DI/DD, Percentage of CURATE.AI profiles successfully created and applied, Timely delivery of DI/DD at indicated time points, Digital intervention limited efficacy, and Digital diagnostic limited efficacy | NCT04848935 |
| Dysarthria as late effect of stroke                               | Enrolling by invitation | Device: Mobile application<br>Other: Treatment as usual                                                      | Ewha Womans University Seoul Hospital     | KR | RCT     | 60 (All)            | Parallel Assignment     | Primary purpose: Treatment<br>Primary outcome measures: Speech intelligibility                                                                                                                                                                                                                                                                                                                                                                   | NCT05146765 |
| ADHD                                                              | Completed               | Device: AKL-T01                                                                                              | Akili Interactive Labs, Inc.              | US | N/A     | 203 (8-14)          | Single Group Assignment | Primary purpose: Treatment<br>Primary outcome measure: Change in Impairment Rating Scale (Clinician Report) Overall Impairment; Cohort 1: Stimulant,                                                                                                                                                                                                                                                                                             | NCT03649074 |
| Chronic Migraine                                                  | Completed               | Device: Nerivio                                                                                              | Theranica                                 | US | N/A     | 126 (18-75)         | Single Group Assignment | Primary purpose: Treatment<br>Primary outcome measure: Pain Relief at 2 Hours Post-treatment                                                                                                                                                                                                                                                                                                                                                     | NCT04194008 |
| Depression                                                        | Completed               | Device: Device: Limbix Spark<br>Other: Psychoeducation Propeller Health System (formerly Asthmapolis System) | Limbix Health, Inc.                       | US | RCT     | 227 (13-21)         | Parallel Assignment     | Primary purpose: Treatment<br>Primary outcome measure: Phase I - Feasibility (Eligibility), Number of Participants With Willingness to Participate and Program Adherence, Phase I - Feasibility (Satisfaction), Phase I - Feasibility (Safety), Phase II - Change in Depressive Symptoms                                                                                                                                                         | NCT04524598 |



|                                                        |            |                                                                                                                    |                                 |    |     |                    |                         |                                                                                                                                                                               |             |
|--------------------------------------------------------|------------|--------------------------------------------------------------------------------------------------------------------|---------------------------------|----|-----|--------------------|-------------------------|-------------------------------------------------------------------------------------------------------------------------------------------------------------------------------|-------------|
| Stress Urinary Incontinence                            | Completed  | Device: Leva Pelvic Digital Health System<br>Other: Kegel exercises                                                | Renovia, Inc.                   | US | RCT | 369 (18-100)       | Parallel Assignment     | Primary purpose: Treatment<br>Primary outcome measure: Efficacy - Urogenital Distress Inventory (UDI-6), Efficacy - Bladder diaries                                           | NCT04508153 |
| Asthma                                                 | Completed  | Device: Propeller Health System (formerly Asthmapolis System)                                                      | Reciprocal Labs                 | US | RCT | 495 (5-90)         | Parallel Assignment     | Primary purpose: Treatment<br>Primary outcome measure: Change in Mean SABA Use                                                                                                | NCT01509183 |
| Insomnia<br>Sleep Initiation and Maintenance Disorders | Completed  | Behavioral: Internet Intervention<br>Behavioral: Patient Education Website                                         | University of Virginia          | US | RCT | 303 (21-65)        | Parallel Assignment     | Primary purpose: Treatment<br>Primary outcome measure: Primary sleep symptoms: sleep onset latency (SOL), wake after sleep onset (WASO), insomnia severity (ISI)              | NCT01438697 |
| Diabetes Mellitus, Type 2<br>Hypoglycemia              | Completed  | Device: d-Nav<br>Device: Blood Glucose Monitoring System                                                           | Hygieia Research LLC            | US | RCT | 181 (21-70)        | Parallel Assignment     | Primary purpose: Treatment<br>Primary outcome measure: Reduction in HbA1C                                                                                                     | NCT02424500 |
| Panic Disorder                                         | Completed  | Device: Canary Breathing System                                                                                    | Palo Alto Health Sciences, Inc. | US | N/A | 69 (18-60)         | Single Group Assignment | Primary purpose: Treatment<br>Primary outcome measure: Percent of Subjects Achieving a 40% Decrease in Overall PDSS Score (Clinically Significant Response)                   | NCT01955954 |
| Stress Disorders, Post-Traumatic                       | Completed  | Device: Freespira Breathing System                                                                                 | Palo Alto Health Sciences, Inc. |    | N/A | 55 (18, and older) | Single Group Assignment | Primary purpose: Treatment<br>Primary outcome measure: Primary outcome of this study will be quantitative improvements using the Clinician Administered PTSD Scale (CAPS - 5) | NCT03039231 |
| Acute Migraine                                         | Terminated | Device: Nerivio                                                                                                    | Theranica                       | US | N/A | 60 (12-17)         | Single Group Assignment | Primary purpose: Treatment<br>Primary outcome measure: Safety of Nerivio Device                                                                                               | NCT04089761 |
| Migraine Without Aura<br>Migraine With Aura            | Completed  | Device: Nerivio<br>Migra-1 active device<br>Device: Nerivio<br>Migra-1 Sham device                                 | Theranica                       | US | RCT | 296 (18-75)        | Parallel Assignment     | Primary purpose: Treatment<br>Primary outcome measure: Percentage of Participants With Reduction of Migraine Headache at 2 Hours Post Treatment                               | NCT03361423 |
| Migraine Headache                                      | Completed  | Device: Randomized treatment/placebo delivery of transcutaneous electro stimulation via a dedicated device Avital. | Theranica                       | IL | N/A | 87 (18-75)         | Single Group Assignment | Primary purpose: Treatment<br>Primary outcome measure: Test of Variables of Attention-Attention Performance Index (Change From Baseline to Posttreatment)                     | NCT02453399 |
| Attention Deficit Disorder With Hyperactivity          | Completed  | Device: AKL-T01<br>Device: AKL-T09                                                                                 | Akili Interactive Labs, Inc.    | US | RCT | 348 (8-12)         | Parallel Assignment     | Primary purpose: Treatment<br>Primary outcome measure: Test of Variables of Attention-Attention Performance Index (Change From Baseline to Posttreatment)                     | NCT02674633 |

|        |            |                                              |                          |    |     |                    |                         |                                                                                                                                                                                                                                                                                                                                                                                                                                                                                                                                                                                                                                                                                                                                                                                                                                                                                                                                                                                                                                                                                                                                                                                                                                                                                                                                                                                                                                                                                                                                    |             |
|--------|------------|----------------------------------------------|--------------------------|----|-----|--------------------|-------------------------|------------------------------------------------------------------------------------------------------------------------------------------------------------------------------------------------------------------------------------------------------------------------------------------------------------------------------------------------------------------------------------------------------------------------------------------------------------------------------------------------------------------------------------------------------------------------------------------------------------------------------------------------------------------------------------------------------------------------------------------------------------------------------------------------------------------------------------------------------------------------------------------------------------------------------------------------------------------------------------------------------------------------------------------------------------------------------------------------------------------------------------------------------------------------------------------------------------------------------------------------------------------------------------------------------------------------------------------------------------------------------------------------------------------------------------------------------------------------------------------------------------------------------------|-------------|
| Cancer | Recruiting | Device: Electronic patient reported outcomes | Oulu University Hospital | FI | N/A | 40 (18, and older) | Single Group Assignment | <p>Primary purpose: Supportive care</p> <p>Primary outcome measure: Change in the spectrum of patient reported symptoms, Change in Patient reported symptom severity, Change in the number of triggered alerts by the tool, Changes in Quality of Life according to QLQ-C30 Summary scores, Correlation between changes in different symptoms and their severity to treatment side-effects, cancer progression, other medical events, or survival, Changes in Patient compliance Questionnaire, Changes in patient compliance according to answering rate to symptom questionnaires, Change in patient compliance according to answering rates to QLQ-C30 questionnaire, Correlation of change in baseline Hb values compared to control Hb values to treatment side-effects, cancer progression, other medical events or survival, Correlation of change in baseline leucocyte values compared to control leucocyte values to treatment side-effects, cancer progression, other medical events or survival, Correlation of change in baseline lymphocyte values compared to control lymphocyte values to treatment side-effects, cancer progression, other medical events or survival, Correlation of change in baseline neutrophil values compared to control neutrophil values to treatment side-effects, cancer progression, other medical events or survival, Correlation of change in baseline CRP values compared to control CRP values to treatment side-effects, cancer progression, other medical events or survival</p> | NCT03928938 |
|--------|------------|----------------------------------------------|--------------------------|----|-----|--------------------|-------------------------|------------------------------------------------------------------------------------------------------------------------------------------------------------------------------------------------------------------------------------------------------------------------------------------------------------------------------------------------------------------------------------------------------------------------------------------------------------------------------------------------------------------------------------------------------------------------------------------------------------------------------------------------------------------------------------------------------------------------------------------------------------------------------------------------------------------------------------------------------------------------------------------------------------------------------------------------------------------------------------------------------------------------------------------------------------------------------------------------------------------------------------------------------------------------------------------------------------------------------------------------------------------------------------------------------------------------------------------------------------------------------------------------------------------------------------------------------------------------------------------------------------------------------------|-------------|

**Supplementary Table 2.** Types of commercialized digital therapeutics with regulatory approval<sup>1-4</sup>

| Product             | Company                            | Disease                                                  | Characteristic                                                        | Approval status                               |
|---------------------|------------------------------------|----------------------------------------------------------|-----------------------------------------------------------------------|-----------------------------------------------|
| WellDoc             | BlueStar                           | Type 1, 2 diabetes                                       | Diabetes self-management app                                          | FDA-510(k)                                    |
| Voluntis            | Insulia                            | Type 1, 2 diabetes                                       | Insulin dosage calculation app for medication management              | FDA-510(k), EU-CE Mark                        |
| Diabeo              | Voluntis                           | Type 1, 2 diabetes                                       | Diabetes mobile app                                                   | EU-CE Mark                                    |
| d-Nav               | HYGIEIA                            | Type 1, 2 diabetes                                       | Insulin Management Program                                            | FDA-510(k)                                    |
| mySugr              | Roche Diagnostics Belgium NV       | Type 1, 2 diabetes                                       | Diabetes management app                                               | EU-CE Mark                                    |
| Dario               | LabStyle Innovations               | Type 1, 2 diabetes                                       | Cloud-based diabetes management system                                | FDA-510(k)                                    |
| ESYSTA App & Portal | Emperra GmbH E-Health Technologies | Type 1, 2 diabetes                                       | Diabetes management app                                               | EU-CE Mark                                    |
| CardiacSense        | Arseus Hospital NV                 | Heart disease                                            | Heart disease monitoring app                                          | EU-CE Mark                                    |
| CureApp-SC          | CureAPP, Inc.                      | Smoking cessation                                        | Smoking cessation monitoring mobile app                               | MHLW (JP)                                     |
| reset               | Pear Therapeutics                  | Substance use disorder (SUD)                             | Computerized behavioral therapy mobile app                            | FDA-510(k)                                    |
| reSET-O             | Pear Therapeutics                  | Opioid use disorder (OUD)                                | Computerized behavioral therapy mobile app                            | FDA-510(k)                                    |
| vorvida             | Orexo                              | Alcohol use                                              | Alcohol use management app                                            | FDA COVID-19 Public Health Emergency Guidance |
| Freespira           | Palo Alto Health Sciences          | Panic disorder and post-traumatic stress disorder (PTSD) | Stress relaxation biofeedback device for PTSD/panic disorder patients | FDA-510(k)                                    |
| Natural Cycles      | Natural Cycles                     | Birth control                                            | Mobile app                                                            | FDA-De Novo, EU-CE Mark                       |
| Propeller Health    | ResMed (Propeller Health)          | Asthma, COPD                                             | Chronic obstructive pulmonary disease management app                  | FDA-510(k)                                    |
| Nucleus Smart App   | Cochlear                           | Ear disorder                                             | Cochlear implant management app                                       | EU-CE Mark                                    |
| ProAir Digihaler    | Teva                               | Asthma, COPD                                             | COPD management app                                                   | FDA-510(k)                                    |
| EndeavorRx          | Akili Interactive Labs             | Pediatric ADHD                                           | Video game                                                            | FDA-De Novo, EU-CE Mark                       |
| TALi                | TALi Digital                       | Attention impairment                                     | Mobile-based game                                                     | PTY 510(k) exempt, EU-CE Mark                 |
| Somryst             | Pear Therapeutics                  | Chronic insomnia                                         | Insomnia and sleep restriction management mobile app                  | FDA-510(k)                                    |

|                                     |                                                       |                                                                            |                                                                |                         |
|-------------------------------------|-------------------------------------------------------|----------------------------------------------------------------------------|----------------------------------------------------------------|-------------------------|
| Oleena                              | Voluntis                                              | Cancer                                                                     | Oncology-related symptoms management mobile app                | FDA-510(k)              |
| PRO-React Onco                      | CANKADO                                               | Cancer                                                                     | Breast cancer management app                                   | EU-CE Mark              |
| Kaiku Health                        | Kaiku Health                                          | Cancer                                                                     | Cancer care app                                                | EU-CE Mark              |
| Noona                               | Varian Medical Systems Belgium                        | Cancer                                                                     | Cancer care app                                                | EU-CE Mark              |
| RemeCare                            | Remecare                                              | Cancer                                                                     | Cancer care app                                                | EU-CE Mark              |
| Sleepio                             | Big Health                                            | Sleep disorder                                                             | Psychiatric disorder mobile app                                | EU-CE Mark              |
| Airview                             | ResMed                                                | Sleep disorder                                                             | Sleep disorder breathing management app                        | EU-CE Mark              |
| Care Orchestrator                   | Philips Belgium Commercial                            | Sleep disorder                                                             | sleep apnea monitoring app                                     | EU-CE Mark              |
| HelloBetter Diabetes and Depression | GET.ON Institut für Online Gesundheitstrainings GmbH  | Depression                                                                 | Depression management app in diabetes patients                 | EU-CE Mark              |
| HelloBetter Chronic Pain            | GET.ON Institut für Online Gesundheitstrainings GmbH  | Chronic pain                                                               | Chronic pain management app                                    | EU-CE Mark              |
| HelloBetter Stress and Burnout®     | GET.ON Institut für Online, Gesundheitstrainings GmbH | Stress and burnout                                                         | Stress management app                                          | EU-CE Mark              |
| HelloBetter Vaginismus Plus         | GET.ON Institut für Online, Gesundheitstrainings GmbH | Vaginismus, dyspareunia and genitopelvic pain/penetration disorder (GPPPD) | Genito-pelvic pain/penetration disorder (GPPPD) management app | EU-CE Mark              |
| leva                                | Renovia, Inc.                                         | Urinary incontinence                                                       | urinary incontinence management app                            | FDA-510(k)              |
| Cara Care                           | HiDoc Technologies                                    | irritable bowel syndrome                                                   | irritable bowel syndrome care app                              | EU-CE Mark              |
| Nerivio                             | Theranica                                             | Migraine                                                                   | Migraine management app                                        | FDA-De Novo, EU-CE Mark |
| moveUP Coach                        | moveUP                                                | hip and knee arthroplasty                                                  | hip and knee arthroplasty treatment, rehabilitation app        | EU-CE Mark              |

*FDA-510(k): Applies to premarket notification and Class 1 and Class 2 medical devices. FDA-de novo: Abbreviation for Evaluation of Automatic Class III Designation. It is a new concept medical device without product classification and is a special expedited approval system granted when the safety of the technology is found to be above a certain level. EU-CE Mark: Products that meet all requirements of European standards relating to safety, health, environment, and consumer protection. Medical devices in Europe must be CE certified. MHLW: Medical device products approved by the Ministry of Health, Labor and Welfare of Japan*

**Supplementary Table 3.** Major indications of digital therapeutics published in peer-reviewed journals and posted on the DTA product library website<sup>1,3,5,6</sup>

| Category    | Chronic disease                                                                                                         | Drug abuse                                                              | Psychiatry                                               | Sleep                                    | Cancer                | Cognitive                                | Obstetrics and gynecology                                                   | Immune disease      | Cranial nerve                       | Etc.                                                |
|-------------|-------------------------------------------------------------------------------------------------------------------------|-------------------------------------------------------------------------|----------------------------------------------------------|------------------------------------------|-----------------------|------------------------------------------|-----------------------------------------------------------------------------|---------------------|-------------------------------------|-----------------------------------------------------|
| Indications | Type 1 and 2 diabetes, asthma, COPD                                                                                     | Smoking cessation                                                       | Panic disorder and post-traumatic stress disorder (PTSD) | Chronic insomnia                         | All cancer Cancer     | Cognitive decline, cognitive dysfunction | Vaginismus, dyspareunia, and genitopelvic pain/penetration disorder (GPPPD) | Lupus Erythematosus | Migraine                            | (Gastroenterology) irritable bowel syndrome         |
|             | Chronic pain                                                                                                            | Substance use disorder (SUD)                                            |                                                          | Sleep disorder                           | Mastectomy            |                                          |                                                                             | Multiple Sclerosis  | Parkinson's Disease                 | (Musculoskeletal disease) hip and knee arthroplasty |
|             | Respiratory system disease (Chronic obstructive pulmonary disease, asthma COPD, pulmonary disease, chronic obstructive) | Opioid use disorder (OUD)                                               | Pediatric ADHD                                           | Sleep disorder (Insomnia, sleep Hygiene) | Lumpectomy            | Mild cognitive impairment                | Birth control                                                               |                     | Dysarthria as late effect of stroke |                                                     |
|             |                                                                                                                         | Alcohol use                                                             | Attention impairment                                     |                                          | Amyloidosis           |                                          |                                                                             |                     |                                     | (Otorhinolaryngology) Ear disorder                  |
|             | Chronic low back pain                                                                                                   | Drug use disorder with Alcohol and Illicit substance use disorder (SUD) | Generalized anxiety disorder                             |                                          | Multiple Myeloma,     |                                          |                                                                             |                     |                                     | (Epidemic) Covid-19                                 |
|             |                                                                                                                         |                                                                         | Depression                                               |                                          | Solitary Plasmacytoma |                                          |                                                                             |                     |                                     |                                                     |
|             | Chronic Kidney Diseases                                                                                                 |                                                                         | Stress and burnout                                       |                                          |                       |                                          |                                                                             |                     |                                     | (Respiratory system disease) Dyspnea                |
|             | Arterial Hypertension                                                                                                   |                                                                         | Schizophrenia                                            |                                          |                       |                                          |                                                                             |                     |                                     | (Urination disease) Urinary incontinence            |
|             | diabetes (type I and II) Fatigue                                                                                        |                                                                         | Major depressive disorder                                |                                          |                       |                                          |                                                                             |                     |                                     |                                                     |
|             | (chronic) heart failure                                                                                                 |                                                                         | Post-partum Depression                                   |                                          |                       |                                          |                                                                             |                     |                                     |                                                     |

**Supplementary Table 4.** Core technology of digital therapeutics

| Company                   | Product                                               | Key technical elements                           | Interface                                                          |
|---------------------------|-------------------------------------------------------|--------------------------------------------------|--------------------------------------------------------------------|
| Pear Therapeutics         | reSET                                                 | · Mobile app<br>· Content                        | · Smartphone application                                           |
|                           | reSET-O                                               |                                                  |                                                                    |
|                           | Somryst                                               |                                                  |                                                                    |
|                           | PEAR-004                                              |                                                  |                                                                    |
| Voluntis                  | Insulia                                               | · Mobile app<br>· Web-app<br>· Content           | · Smartphone application<br>· Web application                      |
|                           | Oleena                                                |                                                  |                                                                    |
|                           | eCO                                                   |                                                  |                                                                    |
|                           | Theraxium Oncology program                            |                                                  |                                                                    |
| WellDoc                   | BlueStar                                              | · Mobile app<br>· Web app<br>· Content           | · Smartphone application<br>· Web application                      |
| Propeller Health          | Nebulizer                                             | · Medical device<br>· Mobile app                 | · IoT device<br>· Smartphone application                           |
| MindMaze                  | Mind Motion PRO                                       | · VR                                             | · Wearable Device                                                  |
|                           | Mind Motion GO                                        | · Game content                                   | · IoT-based game application                                       |
| Palo Alto Health Sciences | Freespira                                             | · Mobile app<br>· Content                        | · Smartphone application                                           |
| Akili Interactive         | EndeavorRx                                            | · Game                                           | · IoT Device                                                       |
|                           | AKL-T02, AKL-T03                                      | · Content                                        | · Smartphone application                                           |
| Big Health                | Sleepio                                               | · Mobile app<br>· Content                        | · Smartphone application                                           |
| Omada Health              | Omada                                                 | · Mobile app<br>· Content                        | · Smartphone application                                           |
| Kaia Health               | COPD Exercise App                                     | · Mobile app                                     | · Smartphone application                                           |
|                           | Musculoskeletal Pain Management App                   | · AI<br>· Content                                |                                                                    |
| Cognoa                    | Autism, ADHD, Pediatric insomnia, Anxiety Therapeutic | · Mobile app<br>· Content                        | · Smartphone application                                           |
| Click Therapeutics        | Clikotine                                             | · Mobile app<br>· Web app<br>· Content           | · Smartphone application<br>· Web application                      |
|                           | CT-141(Clickadian), CT-152, CT-111                    | · Mobile app<br>· Content                        | · Smartphone application                                           |
| ATENTIV                   | ATENTIVmynd                                           | · Mobile app<br>· Game, BCI<br>· Content         | · Smartphone/tablet application                                    |
| Teva                      | ProAir Digihaler                                      | · Sensor<br>· Mobile app<br>· Content            | · IoT device<br>· Smartphone application                           |
| Dthera Sciences           | DTHR-ALZ                                              | · Mobile app<br>· AI<br>· Content                | · Smartphone application                                           |
| Susmed                    | Yawn                                                  | · Mobile app<br>· Content                        | · Smartphone application                                           |
| Vivid Vision              | Vivid Vision                                          | · VR<br>· Game<br>· Content                      | · IoT device<br>· IoT-based game application                       |
| Limbix                    | Limbix Spark                                          | · Mobile app<br>· Content                        | · Smartphone application                                           |
|                           | Limbix VR                                             | · VR<br>· Content                                | · IoT Device<br>· Smartphone/PC application                        |
| Proteus Digital Health    | Ingestible Event Marker (IEM)                         | · Mobile app<br>· Web app<br>· Sensor<br>· Patch | · Wearable device<br>· Smartphone application<br>· Web application |
| Otsuka                    | Abilify Mycite                                        | · Mobile app<br>· Web app<br>· Sensor<br>· Patch | · Smartphone application<br>· Web application<br>· Wearable device |

BCI: Brain Computer Interface; IoT: Internet-of-Things; VR: Virtual Reality

## Supplementary References

- 1 Hong, J. S., Wasden, C. & Han, D. H. Introduction of digital therapeutics. *Comput Methods Programs Biomed* **209**, 106319, doi:10.1016/j.cmpb.2021.106319 (2021).
- 2 Patel, N. A. & Butte, A. J. Characteristics and challenges of the clinical pipeline of digital therapeutics. *NPJ Digit Med* **3**, 159, doi:10.1038/s41746-020-00370-8 (2020).
- 3 Digital Therapeutics Alliance. *Product Library*, <<https://dtxalliance.org/understanding-dtx/product-library/>> (2022).
- 4 Chung, J. Y. Digital therapeutics and clinical pharmacology. *Transl Clin Pharmacol* **27**, 6-11, doi:10.12793/tcp.2019.27.1.6 (2019).
- 5 National Library of Medicine, U. S. *Indications type of digital therapeutics in clinical trials.gov*, <<https://clinicaltrials.gov/ct2/results?cond=&term=%22digital+therapeutics%22&country=&state=&city=&dist=>>> (2022).
- 6 Tye-Murray, N., Spehar, B., Mauze, E. & Cardinal, C. Hearing Health Care Digital Therapeutics: Patient Satisfaction Evidence. *Am J Audiol* **31**, 905-913, doi:10.1044/2022\_aja-21-00236 (2022).
